1 Cross-infection of *Ascaris* spp. in humans and pigs from a  
2 Guarani indigenous village in southern Brazil

3  
4 Short title: Cross-infection of *Ascaris* spp. in an indigenous village from  
5 Brazil

**Veridiana Lenartovicz Boeira<sup>1,2</sup>, Renata Coltro Bezagio<sup>3</sup>, Marina Silva de  
Carvalho<sup>2</sup>, Rinaldo Ferreira Gandra<sup>2</sup>, Ana Paula de Abreu<sup>3</sup>, Cristiano Lara  
Massara<sup>4</sup>, Cristiane Maria Colli<sup>5</sup>, Max Jean de Ornelas Toledo<sup>1,3\*</sup>**

1. Postgraduate Program in Biological Sciences, State University of Maringá, Maringá, Paraná, Brazil.
2. Pharmacy Course, State University of Western Paraná, Cascavel, Paraná, Brazil.
3. Postgraduate Program in Health Sciences, State University of Maringá, Maringá, Paraná, Brazil.
- 6 4. Helminthology Laboratory, René Rachou Institute, FIOCRUZ, Belo Horizonte,  
7 Minas Gerais, Brazil.
- 8 5. Federal University of Grande Dourados, Dourados, Mato Grosso do Sul, Brazil.

\* Corresponding author

E-mail: [mjotoledo@uem.br](mailto:mjotoledo@uem.br) (MJOT)

## Abstract

### Background

*Ascaris lumbricoides* and *Ascaris suum* are nematode parasites that infect millions of people and pigs worldwide, respectively. Reports of cross-infection between the two host species has stimulated molecular epidemiological studies of the *Ascaris* genus. In this study, we evaluated the dynamics of *Ascaris* transmission between Guarani indigenous schoolchildren, pigs, and the environment of a village in the state of Paraná, southern Brazil.

### Methodology/Principal findings

Parasitological and molecular analyses of fecal samples from humans and pigs, and soil samples from the village were carried out. Eggs of *Ascaris* spp. were observed in 8.4% (7/83) of human samples, 44.4% (8/18) of pig samples, and 8.9% (6/68) of soil samples. PCR amplification of the *ITS-1* locus of the rDNA gene in samples that were positive in the parasitological examination revealed cross-infection by the two species, *A. lumbricoides* and *A. suum*, in human and swine hosts. The soil, which was contaminated by both human and swine feces, also contained eggs of the two *Ascaris* species, thus constituting a source of *Ascaris* infection for both hosts. DNA from both nematode species, individually and mixed, was detected in samples from both hosts and the soil.

### Conclusions/Significance

The results of this study indicate that more effective control measures, aimed at the correct disposal of both human and animal feces, should be implemented.

## Author Summary

9 Despite the control measures implemented in Brazilian Indigenous Lands, the  
10 prevalence of intestinal parasites continues to vary from moderate to high in its  
11 inhabitants. On the other hand, the number of indigenous people residing in Brazil  
12 has been increasing in last decades, including the South region of the country,  
13 where a much smaller proportion of indigenous people reside compared to the  
14 North region. *Ascaris lumbricoides* and *Ascaris suum* are the most prevalent  
15 helminth parasites in humans and pigs, respectively. The possibility of cross-  
16 infection by *Ascaris* spp. between humans and pigs has been analyzed in order  
17 to propose more effective control measures. In this research, we use  
18 parasitological and molecular methods to verify the presence of these parasites  
19 in fecal samples from schoolchildren and pigs, in addition to soil samples, from a  
20 Guarani indigenous village in the state of Paraná, southern Brazil. Genetic  
21 material from both individual and associated nematode species was detected in  
22 host and soil samples, indicating cross-transmission in these populations. Control  
23 measures aimed at the correct disposal of human and animal feces must be  
24 implemented in order to minimize damage to health and prevent new infections.

## 25 **Introduction**

26 *Ascaris lumbricoides* is the most prevalent geohelminth in regions endemic  
27 for soil-transmitted helminths. This nematode parasite is a cosmopolitan with  
28 wide geographic distribution; around 500 million individuals are infected  
29 worldwide and infection rates are above 20% in certain regions of Asia, sub-  
30 Saharan Africa, and Latin America [1-3]. In these regions, the high prevalence is  
31 closely related to the lack of basic sanitation and poor hygiene practices,  
32 conditions directly associated with poverty, in addition to climatic factors that favor

33 the biological cycle of the parasite [4]. Ascariasis is therefore considered a  
34 neglected tropical disease and, although the majority of cases do not lead to  
35 death, this disease causes approximately 604 thousand years of life lived with  
36 disability, representing a serious economic and health problem in the affected  
37 countries [5,2].

38 The estimated percentage of pig herds infected by intestinal parasites  
39 worldwide is high (~50%), particularly among pigs raised in extensive and organic  
40 animal production systems when compared to those in industrialized systems [6-  
41 7]. One of the most reported species of parasite in pig herds is the helminth  
42 *Ascaris suum*, which was first described by Goeze in 1782 [6-9].

43 *Ascaris lumbricoides* and *Ascaris suum* are considered cryptic because  
44 they have great biological and morphological similarity; the species can only be  
45 differentiated by differences in the labial denticles of adult helminths using  
46 scanning electron microscopy. Species-specific identification through  
47 visualization of eggs by optical microscopy is impossible, since they are  
48 morphologically identical [10-12].

49 The real scenario of human and swine ascariasis, in endemic and non-  
50 endemic regions, is still unknown and is difficult to address by conventional  
51 coproparasitological methods, such as microscopy. Comparative analyses of  
52 ribosomal DNA (rDNA) comprising the internal transcribed spacer 1 (*ITS-1*) locus  
53 revealed deletions in the *A. lumbricoides* sequence and polymorphisms in the  
54 alignment between the two species, totaling six divergent nucleotide positions.  
55 The sum of these factors results in a genetic divergence of 1.3% between the  
56 *ITS-1* sequences of *A. lumbricoides* and *A. suum*, with a variation of up to 0.2%

57 within the taxon, enabling the species to be differentiated by molecular  
58 techniques [13-15].

59 According to 2022 census data, the number of indigenous people  
60 residing in Brazil was 1,693,535, which represented 0.83% of the country's total  
61 population; this was an 88.82% increase from the 2010 census number [16]. More  
62 than half of Brazilian indigenous people live in the Legal Amazon while 44.48%  
63 (753,284 people) are concentrated in the North region of the country [16]. Only  
64 5.20% of this population (88,097 people) reside in the South region of Brazil.

65 The prevalence of enteroparasitosis in the Brazilian indigenous  
66 population continues to be moderate to high, despite the implementation of  
67 control activities, such as housing improvements, water pipe installation and  
68 water treatment, and mass antiparasitic treatment of the population [17-19].  
69 Therefore, reducing the morbidity and mortality caused by enteroparasite  
70 infection in this population still remains a challenge for health authorities.

71 In principle, indigenous people have more frequent contact with domestic  
72 animals and, to a certain extent, with wild animals, than the rest of society. The  
73 link between pathogens, the environment, animal species, and humans is  
74 inseparable, and thus, developing strategies to avoid or minimize current health  
75 problems requires collaboration from different fields of research. This approach  
76 is called "One Health" [20] and, following the COVID-19 pandemic, recognition of  
77 its relevance has grown [21].

78 In this study, using a One Health approach, we sought to analyze the  
79 dynamics of transmission of *Ascaris* spp. in a Guarani indigenous village in  
80 Paraná, southern Brazil, through the identification and molecular characterization  
81 of isolates obtained from samples of human and swine feces and soil.

82

## 83 **Materials and methods**

### 84 **Ethical aspects**

85 This study was approved by the National Research Ethics Commission  
86 through Opinion 1.756.060/2016, with participation in the study conditional on the  
87 signing of the free and informed consent form by the parents/guardians of the  
88 schoolchildren that provided fecal samples. The research was authorized by local  
89 indigenous leaders and the Special Indigenous Health District - South Coast.

90

### 91 **Study area**

92 In the state of Paraná, located in the South region of Brazil, 23 indigenous  
93 lands/villages exist, corresponding to an area of 85,264.30 hectares [22]. The  
94 Tekoha Ocoy Indigenous Land, called Santa Rosa do Ocoy village, is located in  
95 the municipality of São Miguel do Iguaçu, west of Paraná (25° 20' 50" S; 54° 14'  
96 6" W). The village is located 14 km away from the urban center of São Miguel do  
97 Iguaçu and covers a territory of around 250 hectares (Fig 1). The village receives  
98 assistance from the National Indigenous People Foundation, the National Health  
99 Foundation, the Itaipu Binacional Hydroelectric Plant, and the São Miguel do  
100 Iguaçu City Hall. The people of the village use Portuguese and Guarani as a form  
101 of communication.

102

**Fig 1. Map showing the geographic location and physical delimitation of Santa Rosa do Ocoy village of the Guarani indigenous people, located in municipality of São Miguel do Iguaçu, Paraná, Brazil. Shaded area of the map**

of Brazil represents the state of Paraná. within this area indicates the indigenous land. Adapted from the Central Intelligence Agency (CIA – USA).

Source: the author

103           The indigenous community is located on the edge of Itaipu lake, with the  
104 residences surrounding the lake, divided into groups according to the kinship  
105 between the families. The houses are made of stone and wood and have straw-  
106 thatched roofs. In addition, the village has community spaces, including a prayer  
107 house, football fields, a warehouse for meetings and gatherings, a school, and a  
108 basic health unit [23].

## 109 **Population**

110           According to the 2022 census, approximately 30,460 indigenous people  
111 were living in Paraná [16], belonging to three ethnicities: Guarani, Kaingáng, and  
112 Xetá. The village of Santa Rosa do Ocoy is inhabited by approximately 500  
113 people belonging to the Guarani ethnic group, who are distributed among 106  
114 households. Around 50% of the population is under 15 years of age, which is a  
115 common characteristic of the indigenous peoples of Brazil [16].

116           The study population consisted of schoolchildren, aged between 5 and 19  
117 years, following the Toledo distribution [24]. All students enrolled at the local  
118 indigenous school, Colégio Indígena Teko Nemoingo, from nursery to high school  
119 age, were invited to participate in the study (around 270 students).

120

## 121 **Sample collection**

122           Collection bottles (polypropylene bottles with a screw cap) for fecal  
123 samples, duly labeled with the participants' names, were delivered, along with  
124 verbal and written instructions on how to perform the sample collection, to all  
125 children at the school, with the help of indigenous community health agents. The  
126 sample collection was carried out by parents, guardians, or by the children  
127 themselves if they were able to understand and correctly carry out the collection  
128 on their own, between November 2019 and August 2022. The bottles containing  
129 the samples were collected by the village health team and placed in thermal  
130 boxes with reusable artificial ice, which were sent to the Clinical Parasitology  
131 Laboratory of the University of Western Paraná (UNIOESTE), located in the  
132 Teaching, Research and Extension Laboratory of the University Hospital of  
133 Western Paraná, within 24 h of collection.

134           Samples of pig feces were collected randomly from fresh evacuations  
135 observed by the research team in the closed pigsties. The samples were placed  
136 in duly identified collection bottles, which were then placed in thermal boxes with  
137 artificial ice and sent to the same laboratory for analysis.

138           For the soil samples, collection points were chosen close to the school,  
139 residences with animals raised in the home, and residences in different locations  
140 within the village area, respecting a perimeter of 10 m around each collection  
141 location. Approximately 50 g of soil were collected from each point at a depth of  
142 5 cm. Different climatic and humidity conditions that could influence the results  
143 were taken into account, and thus, collection was repeated at the same points in  
144 each of the four seasons of the years 2019 and 2021. The samples were placed  
145 in collection bottles, labelled with the date and location of collection, and then  
146 sent for analysis in the same way as the fecal samples. No preservatives were



147 used for any type of sample collected.

148

## 149 **Soil sample treatment**

150 The soil of the village was classified as clayey, making it difficult to extract  
151 compounds as it is more compacted than other types of soil [25]. To reduce dirt  
152 and interference in the analyses, the concentration and purification protocol of  
153 the Ministry of Health was performed [26], where 10 g of sample was mixed with  
154 1 M glycine to a volume of 40 mL, homogenized for 30 min at 20 rpm, then  
155 completed to 50 mL with 1 M glycine and left to rest for 5 min. The supernatant  
156 was then transferred to another tube, centrifuged at  $2,100 \times g$  for 10 min, and the  
157 sediment was subjected to parasitological analysis.

158

## 159 **Parasitological analyses**

160 Analysis of the samples was carried out at the UNIOESTE Clinical  
161 Parasitology Laboratory. When immediate analysis was not possible, the  
162 samples were kept refrigerated for a maximum of 2 days.

163 Fecal samples from humans ( $n=86$ ), together with those from pigs ( $n=18$ )  
164 and soil ( $n=68$ ) were processed by spontaneous sedimentation in water [27]. The  
165 sediments (3 mL) were then subjected to the Ritchie method [28] adapted by  
166 Bezagio et al. [29].

167 The samples were placed on slides and stained with Lugol, which were  
168 then examined by optical microscopy on an Olympus CX31® microscope  
169 (Olympus Corporation, Tokyo, Japan) with a  $10\times$  objective; structures were  
170 confirmed at  $400\times$  magnification. The presence of parasite eggs, larvae, or cysts  
171 was considered a positive result, regardless of the quantity.

172

## 173 **Molecular analyses**

174 Molecular analyses for the detection of *Ascaris* genetic material and  
175 identification of the species was carried out for all fecal and soil samples,  
176 regardless of the microscopy results. Positive and negative controls were also  
177 used.

178

## 179 **DNA extraction**

180 First, the efficiency of two commercial DNA extraction kits was tested using  
181 samples from the laboratory that were known to be positive for *Ascaris* spp. The  
182 PureLink PCR Purification<sup>®</sup> Kit (Invitrogen, Carlsbad, CA, USA) was used for  
183 laboratory samples that had or had not undergone prior sonication treatment for  
184 disruption of the *Ascaris* spp. egg membrane: 50 Hz for 30 s at 4°C, repeated 4  
185 times, with an interval of 1 min between cycles. The QIAmp<sup>®</sup> DNA Stool Mini Kit  
186 (Qiagen, Hilden, Germany), which is widely used for DNA extraction from fecal  
187 samples, was used only for laboratory samples that had not undergone the  
188 sonication procedure. The intensity of the bands observed in an electrophoresis  
189 gel after PCR with the extracted samples informed which DNA extraction method  
190 was subsequently used for the collected samples.

191

## 192 **Amplification of the *ITS-1* fragment**

193 The approximately 580 base pair (bp) fragment of the *ITS-1* locus was  
194 amplified by nested PCR with the primers F2662 5'-  
195 GGCAAAGTCGTAACAAGGT-3' and R3214 5'-  
196 CTGCAATTCGCACTATTTATCG-3', according to Ishiwata et al. [30]. Each

197 amplification reaction was performed in a final volume of 10  $\mu$ L, containing 1 $\times$   
198 reaction buffer (200 mmol/L Tris-HCl pH 8.4, 500 mmol/L KCl), 2.5 mmol/L MgCl<sub>2</sub>,  
199 1 U of Platinum<sup>®</sup> Taq DNA Polymerase (Invitrogen, Lithuania), 200  $\mu$ mol/L  
200 deoxyribonucleotide triphosphate, 2 pmol of each primer, sterile Milli-Q<sup>®</sup> water,  
201 and 2  $\mu$ L of DNA. Amplification conditions were used according to Sadaow et al.  
202 [14]: pre-incubation at 95°C for 5 min, followed by 35 cycles at 95°C for 30 s,  
203 55°C for 30 s, and 72°C for 30 s, and then a final extension at 72°C for 10 min.

204

### 205 **Genotyping of *Ascaris* spp.**

206 Three primers were used in the same reaction; two of which were species-  
207 specific forward primers, F. *Al* specific for *A. lumbricoides* (5'-GCGGTTTCTTTT  
208 TTTTTTCGCG-3') and F. *As* specific for *A. suum* (5'-GAGAAAGCTCCTCGT  
209 TGCGG-3'), and a reverse primer (5'-CCACGAACCGAGTGATCCAC-3'), which  
210 anneals to a region common to both species (*R. both*). Amplification of genetic  
211 material from *A. lumbricoides* results in a fragment of approximately 384 bp, with  
212 the combination of primers F. *Al* + *R. both*, while for *A. suum*, the combination of  
213 primers F. *As* + *R. both* results in a fragment of approximately 176 bp. This  
214 technique allows either or both species to be detected in the same reaction (Fig  
215 2). Conventional PCRs were performed, in a final volume of 10  $\mu$ L, containing 1 $\times$   
216 reaction buffer (200 mmol/L Tris-HCl pH 8.4, 500 mmol/L KCl), 2.5 mmol/L MgCl<sub>2</sub>,  
217 1 U of Platinum<sup>®</sup> Taq DNA polymerase (Invitrogen, Lithuania), 200  $\mu$ mol/L  
218 deoxyribonucleotide triphosphate, 2 pmol of each primer, sterile Milli-Q<sup>®</sup> water,  
219 and 5  $\mu$ L of DNA from the first reaction. Amplifications were performed using the  
220 following program: pre-incubation at 95°C for 5 min, 30 cycles at 95°C for 30 s,  
221 60°C for 45 s, and 72°C for 45 s, and a final extension step at 72°C for 8 min [31].

222

**Fig 2. Molecular identification scheme of *Ascaris* spp. based on the *ITS-1* locus, using DNA extracted from the egg suspension.** The first PCR used primers F2662 and R3214 for the amplification of the *ITS-1* locus (~580 bp), and thus, the identification of *Ascaris* spp. The second PCR used the fragment resulting from the first PCR, together with two species-specific forward primers (F *Al* and F *As*) and a common reverse primer (R *both*), for the identification of *A. lumbricoides* (~384 bp) and *A. suum* (~176 bp).

Source: the author

223 In all reactions, a positive control for *A. lumbricoides* was used (DNA  
224 provided by Helminthology Laboratory of the René Rachou Institute), a positive  
225 control for *A. suum* (DNA extracted from samples of adult worms from swine),  
226 and a negative control with Milli-Q® water in place of DNA were used.

227 The products of these reactions were visualized on 5% polyacrylamide  
228 gels, stained with silver, and digitally photographed.

229

## 230 Results

231 All students (approximately 270), aged between 5 and 19, enrolled in the  
232 indigenous school of the village were invited to participate in the study; however,  
233 only 86 bottles (approximately 30.5%) containing fecal samples were returned for  
234 analysis. Three samples were excluded because they had an insufficient amount  
235 of material to carry out the analyses. The total prevalence of intestinal parasites  
236 in the schoolchildren was 81.9% (68/83); 47.0% (39/83) had polyparasitism while  
237 the specific prevalence of *Ascaris* spp. was 8.4% (7/83) Table 1.

238

**Table 1. Total and species-specific prevalence of intestinal protozoa and helminths in indigenous Guarani schoolchildren from the village of Santa Rosa do Ocoy, municipality of São Miguel do Iguaçu, state of Paraná, southern Brazil, between November 2019 and August 2022 (n=83).**

|                                        | <b>No. positive samples</b> | <b>Prevalence (%)</b> |
|----------------------------------------|-----------------------------|-----------------------|
| <b>Total</b>                           | 68                          | 81.9                  |
| <b>Polyparasitism</b>                  | 39                          | 47.0                  |
| <b>Protozoa</b>                        | 62                          | 74.7                  |
| <i>Entamoeba coli</i>                  | 34                          | 40.9                  |
| <i>Endolimax nana</i>                  | 30                          | 36.1                  |
| <i>Giardia duodenalis</i>              | 26                          | 31.3                  |
| <i>Entamoeba histolytica/E. dispar</i> | 21                          | 25.3                  |
| <i>Blastocystis hominis</i>            | 8                           | 9.6                   |
| <i>Iodamoeba butschlii</i>             | 6                           | 7.2                   |
| <b>Helminths</b>                       | 27                          | 32.5                  |
| <i>Hymenolepis nana</i>                | 22                          | 26.5                  |
| <i>Ascaris</i> spp.                    | 7                           | 8.4                   |
| <b>Hookworms</b>                       | 4                           | 4.8                   |
| <i>Trichuris trichiura</i>             | 1                           | 1.2                   |

239

240 Fecal samples from pigs were collected in March 2020, which coincided  
241 with the beginning of the COVID-19 pandemic, and in July 2022, as access to  
242 the village was prohibited during the pandemic. The pigs were located outside  
243 the residences, being kept in closed pigsties with restricted access to areas close

244 to the houses. Of the 18 samples collected, 44.4% were positive for *Ascaris* spp.

245 Table 2.

246

**Table 2. Total and species-specific prevalence of intestinal protozoa and helminths in pigs from the village of Santa Rosa do Ocoy, municipality of São Miguel do Iguaçu, state of Paraná, southern Brazil (n=18). Samples collected in March 2020 and July 2022.**

| <b>Species</b>                    | <b>No. positive samples</b> | <b>Prevalence (%)</b> |
|-----------------------------------|-----------------------------|-----------------------|
| <b>Total</b>                      | 10                          | 55.6                  |
| <b><i>Ascaris</i> spp.</b>        | 8                           | 44.4                  |
| <b><i>Balantidium coli</i></b>    | 2                           | 11.1                  |
| <b><i>Entamoeba</i> sp.</b>       | 1                           | 5.6                   |
| <b><i>Trichuris trichiura</i></b> | 1                           | 5.6                   |
| <b>Hookworms (larva)</b>          | 1                           | 5.6                   |

Of the 68 soil samples collected, 52 (76.5%) were positive for at least one parasite species, the majority with zoonotic potential for infection in humans. Six samples (8.9%) were positive for *Ascaris* spp. Table 3.

**Table 3. Total and species-specific prevalence of parasitic forms found in peridomiciliary soil samples from the village of Santa Rosa do Ocoy, municipality of São Miguel do Iguaçu, state of Paraná, southern Brazil (n=68). Samples collected throughout 2019 and 2021.**

| <b>Species</b> | <b>No. positive samples</b> | <b>Prevalence (%)</b> |
|----------------|-----------------------------|-----------------------|
|----------------|-----------------------------|-----------------------|

|                                               |    |      |
|-----------------------------------------------|----|------|
| <b>Total</b>                                  | 52 | 76.5 |
| <b><i>Strongyloides stercoralis</i> larva</b> | 51 | 75.0 |
| <b>Hookworm larva</b>                         | 15 | 22.1 |
| <b>Egg of <i>Ascaris</i> spp.</b>             | 6  | 8.9  |
| <b><i>Balantidium coli</i> trophozoite</b>    | 2  | 2.9  |
| <b><i>Balantidium coli</i> cyst</b>           | 2  | 2.9  |

---

247

248 Sediments of fecal and soil samples, obtained using the Ritchie method  
249 adapted by Bezagio et al. [29], were sonicated to rupture the *Ascaris* spp. egg  
250 membrane (Fig 3), thus favoring DNA extraction, as described below.

**Fig 3. Microphotograph of fecal sample sediment showing eggs of *Ascaris* spp. ruptured** (arrows) after sonication at 50 Hz for 30 s at 4°C, repeated 4 times, with a 1 min interval between cycles. 100× magnification.

Source: the author

251 Three DNA extraction/purification methods were evaluated using a known  
252 *A. lumbricoides*-positive sample and all methods appeared to be efficient. Subtle  
253 differences were observed in the intensities of the *ITS-1* locus band of the  
254 extracted samples following PCR (Fig 4). Extraction with the PureLink® PCR  
255 Purification Kit (Invitrogen, Carlsbad, CA, USA) preceded by sample sonication  
256 resulted in a slightly more intense band than the other two protocols tested, and  
257 thus, this method was chosen for the DNA extraction of samples collected in this  
258 study (Fig 4).

259

**Fig 4. A 5% polyacrylamide gel showing bands of approximately 580 bp characteristic of the *ITS-1* locus of *Ascaris* spp.** 1. DNA ladder; 2. *A. lumbricoides*-positive laboratory sample extracted with the PureLink® PCR Purification Kit after sonication (50 Hz for 30 sec at 4°C repeated 4 times with 1 min interval between cycles); 3. *A. lumbricoides*-positive laboratory sample extracted with the PureLink® PCR Purification Kit without sonication; 4. *A. lumbricoides*-positive laboratory sample extracted with the QIAmp® DNA Stool Mini Kit after sonication; 5. positive control (*A. lumbricoides* DNA); and 6. negative control (PCR reaction without DNA).

260           The sediments of the collected samples (human and pig feces and soil)  
261 were submitted to DNA extraction followed by PCR amplification of the *ITS-1*  
262 locus. Genotyping was then carried out using the PCR products from the *ITS-1*  
263 amplification reaction to verify the presence of *A. lumbricoides* and *A. suum*.  
264 Table 4 shows the results of microscopy analysis and the *ITS-1* genotyping in the  
265 three sample types. The DNA of *Ascaris* spp. was amplified from all samples that  
266 were positive in the microscopy analysis. Twice as many samples that were  
267 negative in the microscopy were randomly chosen to undergo the amplification  
268 reaction for validation, and all were negative.

269

**Table 4. Parasitological and molecular detection of *Ascaris* spp. in fecal samples from indigenous Guarani schoolchildren and pigs, as well as soil samples, using optical microscopy and PCR genotyping of the *ITS-1* locus. Samples were collected from the village of Santa Rosa do Ocoy, municipality of São Miguel do Iguacu, state of Paraná, southern Brazil.**



| Sample | Origin | Microscopy | ITS-1 PCR | Species      |
|--------|--------|------------|-----------|--------------|
| H05    | Human  | -          | -         |              |
| H06    | Human  | -          | -         |              |
| H07    | Human  | +          | +         | <i>AI</i>    |
| H09    | Human  | -          | -         |              |
| H23    | Human  | +          | +         | <i>AI</i>    |
| H27    | Human  | -          | -         |              |
| H31    | Human  | -          | -         |              |
| H32    | Human  | +          | +         | <i>AI</i>    |
| H36    | Human  | -          | -         |              |
| H41    | Human  | -          | -         |              |
| H50    | Human  | -          | -         |              |
| H61    | Human  | -          | -         |              |
| H66    | Human  | -          | -         |              |
| H70    | Human  | -          | -         |              |
| H71    | Human  | -          | -         |              |
| H78    | Human  | -          | -         |              |
| H79    | Human  | +          | +         | <i>AI/As</i> |
| H80    | Human  | +          | +         | <i>AI</i>    |
| H81    | Human  | -          | -         |              |
| H82    | Human  | +          | +         | <i>AI/As</i> |
| H83    | Human  | +          | +         | <i>AI/As</i> |
| P01    | Pig    | -          | -         |              |
| P02    | Pig    | -          | -         |              |
| P03    | Pig    | -          | -         |              |
| P04    | Pig    | -          | -         |              |
| P05    | Pig    | +          | +         | <i>As</i>    |
| P06    | Pig    | +          | +         | <i>As</i>    |
| P07    | Pig    | +          | +         | <i>As</i>    |
| P08    | Pig    | -          | -         |              |
| P09    | Pig    | +          | +         | <i>As</i>    |
| P10    | Pig    | -          | -         |              |
| P11    | Pig    | -          | -         |              |
| P12    | Pig    | -          | -         |              |
| P13    | Pig    | +          | +         | <i>As</i>    |
| P14    | Pig    | +          | +         | <i>As</i>    |
| P15    | Pig    | -          | -         |              |
| P16    | Pig    | +          | +         | <i>As</i>    |
| P17    | Pig    | -          | -         |              |
| P18    | Pig    | +          | +         | <i>AI/As</i> |
| S11    | Ground | +          | +         | <i>As</i>    |
| S21    | Ground | -          | -         |              |
| S31    | Ground | -          | -         |              |
| S51    | Ground | -          | -         |              |
| S101   | Ground | -          | -         |              |
| S121   | Ground | -          | -         |              |
| S151   | Ground | +          | +         | <i>AI/As</i> |
| S161   | Ground | -          | -         |              |
| S01P   | Ground | -          | -         |              |
| S02P   | Ground | +          | +         | <i>AI</i>    |
| S03P   | Ground | -          | -         |              |
| S05P   | Ground | -          | -         |              |
| S07P   | Ground | +          | +         | <i>AI/As</i> |
| S10P   | Ground | -          | -         |              |
| S11P   | Ground | +          | +         | <i>As</i>    |
| S12P   | Ground | +          | +         | <i>AI</i>    |
| S14P   | Ground | -          | -         |              |

+ Positive; - Negative; *AI*, *Ascaris lumbricoides*; *As*, *Ascaris suum*.

270 Of the human fecal samples that were positive in the parasitological  
271 examination and exhibited amplification of the *ITS-1 locus* (7/83), 57.1% (4/7)  
272 presented a band of ~396 bp, characteristic of *A. lumbricoides*, and 42.9% (3/7)  
273 showed a ~396 bp band together with a band of ~176 bp, characteristic of *A.*  
274 *suum*. The presence of both bands indicated a mixed infection of the two *Ascaris*  
275 species in humans. Among the positive pig fecal samples (8/18), 87.5% (7/8)  
276 presented the ~178 bp band and 1/8 (12.5%) showed both bands, suggesting  
277 mixed infection in these animals. Of the *Ascaris*-positive soil samples (6/68),  
278 33.3% (2/6) showed the *A. lumbricoides* characteristic band, 33.3% (2/6) showed  
279 the *A. suum* characteristic band, and 33.3% (2/6) showed both bands. Some  
280 representative samples of these results are presented in Fig 5.

**Fig 5. A 5% polyacrylamide gel showing the bands resulting from the *ITS-1 locus* genotyping PCRs of human and pig fecal samples and soil samples.**

The band for *A. lumbricoides* is ~384 bp and for *A. suum* is ~176 bp. 1: DNA ladder; 2: positive control for *A. lumbricoides*; 3: positive control for *A. suum*; 4 and 5: human feces samples that were positive in the parasitological examination; 6: human feces samples that were negative in the parasitological examination; 7 and 8: pig feces samples that were positive in the parasitological examination; 9: pig feces samples that were negative in the parasitological examination; 10, 11, and 12: soil samples that were positive in the parasitological examination; 13: soil sample that was negative in the parasitological examination; 14: negative control.

## 281 Discussion

282 This is the first molecular epidemiology study to determine the prevalence  
283 of *Ascaris* spp. in an indigenous community of Brazil, genetically and culturally  
284 distinct from the surrounding society, and to evaluate the circulation of this  
285 pathogen between humans, pigs, and the environment (soil).

286 Human ascariasis is a serious public health problem in developing  
287 countries [18]. The biological cycle of the parasite is favored by poor basic  
288 sanitation, poor hygiene practices, and a population living in poverty, which,  
289 together with climatic conditions, contribute to high levels of prevalence,  
290 especially in school-age children [1,3,4,32,33].

291 In this study, the highest prevalence of *Ascaris* spp. was recorded in pigs  
292 (44.4%), followed by the soil (8.8%) and, finally, in humans (8.4%). The low  
293 prevalence of *Ascaris* spp. observed in schoolchildren from this Guarani village  
294 does not correspond to the reality of many other Indigenous Lands in Brazil; in a  
295 study conducted in the state of Minas Gerais, southeastern Brazil, the infection  
296 rate was reportedly 34.4% [34], while a 63.5% infection rate was reported for  
297 another region of Paraná [24]. This divergence could be the result of periodic  
298 antiparasitic treatment and, to a lesser extent, to housing improvements  
299 implemented by the government in this region in recent years [19,24,34,35].

300 Although the prevalence of soil-transmitted helminths, such as *Ascaris*  
301 spp., *Trichuris trichiura*, and hookworm, and intestinal helminths in the  
302 schoolchildren of the village was generally low (32.5% compared to 74.7% for  
303 intestinal protozoa), *Hymenolepis nana* was the most prevalent helminth in this  
304 population. Similar prevalence rates of *H. nana* have been reported for other

305 Indigenous Lands of Paraná, inhabited by Kaingáng indigenous people, where  
306 similar prophylactic measures were adopted [24].

307 The epidemiological picture of human ascariasis around the world has  
308 shown some considerable changes, with increasing reports of this parasitic  
309 disease in developed countries, where cases of infection in humans were low or  
310 non-existent [36,37]. While *A. lumbricoides* typically affects humans and *A. suum*  
311 infects pigs [10], when human infection during travel or residence in endemic  
312 areas is ruled out, contamination with fecal material from pigs has been identified  
313 as the main source of infection [38]. Studies have shown that non-endemic  
314 regions usually present high levels of cross-infection, with humans being infected  
315 by *Ascaris* spp. derived from pigs, as well as a high percentage of hybrids, and  
316 thus, ascariasis has been characterized as a zoonosis in these regions [36, 39-  
317 41]. These reports strongly point to the zoonotic potential of *A. suum* [6,38,42],  
318 and the ability of *A. suum* to develop infection in experimentally infected humans  
319 has already been demonstrated [43].

320 The methods routinely used for the diagnosis of ascariasis do not allow  
321 identification at the species level, owing to the indistinguishable morphology of  
322 the eggs between species. The diagnosis is therefore inferred based on the host  
323 species under analysis and the epidemiology of the region [44-46]. However,  
324 given the changing epidemiological picture, molecular techniques that allow the  
325 identification of *Ascaris* species from the DNA of a single egg have been  
326 developed. These typically require the use of three primers in the same reaction,  
327 in which two primers are species-specific (one for each allele) and one primer is  
328 common [31,47,48].

329 To perform these molecular analyses, DNA must first be extracted from

330 the sample. Three DNA extraction/purification procedures were evaluated in the  
331 current study. As *Ascaris* spp. eggs have three membranes that protect from  
332 environmental changes [49], sonication of the samples prior to DNA extraction  
333 appeared to favor the extraction process [50] and was performed prior to  
334 extraction with the PureLink PCR Purification® Kit.

335 It was possible to identify and differentiate the species of *Ascaris* through  
336 the molecular analysis of the *ITS-1* locus of samples of human and pig feces, as  
337 well as soil, and thus, the occurrence of cross-infection in the village could be  
338 investigated. In this study, 42.9% of positive human fecal samples presented both  
339 *A. lumbricoides* and *A. suum*, suggesting the occurrence of swine-human  
340 transmission of *Ascaris* in a high proportion of infected individuals. This is  
341 different from other studies which have demonstrated that, in endemic regions,  
342 cases of human infection are the result of human-to-human transmission [14, 39].  
343 The description of 54 dominant haplotypes and genotypes in *Ascaris* originating  
344 from a given host reveal a host affiliation in sympatric populations of endemic  
345 regions [50-53]. Therefore, it is crucial to understand the distribution of haplotypes  
346 and frequency of hybrids in the *Ascaris* population in a given region [41,53-56].

347 The *ITS-1* locus was used as the molecular target of choice in this study  
348 because it is a region with multiple copies in the parasite genome and has well-  
349 characterized single nucleotide polymorphisms between the two species. At  
350 nucleotide position 133, a guanine is present in the *A. lumbricoides* sequence  
351 and a cytosine in the *A. suum* sequence; at position 246 a thymine is present in  
352 the *A. lumbricoides* sequence and an adenine in the *A. suum* sequence; and at  
353 position 323 an adenine is present in *A. lumbricoides* and a guanine in *A. suum*  
354 [14,36,57].

355           The results of the molecular analyses confirmed the results of the  
356 parasitological microscopy analyses and showed that the samples analyzed in  
357 this study demonstrated a pattern of transmission between host species. This  
358 corroborates the results of analyses carried out by other research groups who,  
359 using mitochondrial (mt)DNA and microsatellite markers, analyzed the sharing of  
360 *Ascaris* haplotypes and genotypes between Brazilian human and swine  
361 populations, indicating that cross-infection is occurring in some regions  
362 [11,53,56].

363           In our study, PCR for the *ITS-1* region did not detect *Ascaris* DNA in any  
364 of the samples that were negative in the parasitological examination. In other  
365 words, the two techniques used in the examination of the biological materials,  
366 light microscopy and PCR, showed high sensitivity, that is, the ability to detect  
367 the parasite. However, the molecular technique has an advantage over  
368 parasitological techniques by enabling the identification of the species/genotype  
369 of the parasite present in the sample.

370           In other Indigenous Lands of Paraná inhabited by other ethnic groups,  
371 such as the Kaingáng, where pigs are raised freely, in an extensive system, the  
372 soil constitutes an important source of parasitic contamination since, as already  
373 demonstrated, the same species of intestinal parasites can be found in human  
374 feces and soil [24,40,58]. Differently, in the Guarani indigenous village of the  
375 present study, pigs are raised in a non-extensive, confined regime. However, as  
376 was observed *in situ* by researchers, pigs occasionally escape from the pens,  
377 being able to defecate in areas where people circulate, and contaminate the soil  
378 with species of parasites with zoonotic potential.

379           Despite the low rate of contamination by *Ascaris* spp. found in this study

380 when compared to the rates reported for studies of other Indigenous Lands  
381 [24,33,40,59], the human-soil-swine transmission link was demonstrated by  
382 genotyping and the mixed infection findings in humans and pigs, and the  
383 contamination of soil by both species.

384

## 385 **Conclusions**

386 This study reveals cross-infection by the two nematode species, *A.*  
387 *lumbricoides* and *A. suum*, in human and swine hosts from a Guarani indigenous  
388 village in southern Brazil. In addition to the hosts, the soil was contaminated with  
389 both species of *Ascaris*. Pure and genetically mixed or hybrid samples were  
390 observed in both hosts and in the soil, confirming that is a source of infection for  
391 human and animal populations.

392 Given the cross-infection in the village, which confirms the zoonotic nature  
393 of ascariasis, more effective and targeted control measures must be  
394 implemented, such as better containment of pigs to prevent access to human  
395 feces, in order to reduce the infection rates of *Ascaris* spp.

396 The molecular analysis of *Ascaris* in humans and pigs can contribute to  
397 the development of control measures, and future studies should be carried out in  
398 this and other sympatric areas to further enhance our knowledge about the  
399 transmission dynamics of this parasite.

400

## 401 **Acknowledgments**

402 The authors would like to express their gratitude to Lilian Maria Rodrigues and  
403 Bonifácia Rero Takua Alves for their valuable assistance in recruiting  
404 participants, Eloiza Cristina Martelli and Guilherme Martins Boeira in collecting

405 the soil and pigs' feces for this study.

## References

1. Pullan RL, Smith JL, Jasrasaria R, and Brooker SJ. Global numbers of infection and disease burden of soil transmitted helminth infections in 2010. *Parasit Vectors*. 2014; 7:37. doi: 10.1186/1756-3305-7-37
2. Global Burden of Disease 2018, 2019 Institute for Health Metrics and Evaluation (IHME Seattle, WA: IHME). University of Washington, 2021. Available from: [https://www.healthdata.org/search?search\\_api\\_fulltext=ascariasis](https://www.healthdata.org/search?search_api_fulltext=ascariasis)
3. Okoyo C, Campbell SJ, Williams K, Simiyu E, Owaga C, and Mwandawiro C. Prevalence, intensity and associated risk factors of soil-transmitted helminth and schistosome infections in Kenya: Impact assessment after five rounds of mass drug administration in Kenya. *PLoS Negl Trop Dis*. 2020; 14(10):e0008604. doi: 10.1371/journal.pntd.0008604
4. Lai YS, Biedermann P, Shrestha A, Chammartin F, À Porta N, Montresor A, et al. Risk profiling of soil-transmitted helminth infection and estimated number of infected people in South Asia: A systematic review and Bayesian geostatistical analysis. *PLoS Negl Trop Dis*. 2019; 13(8):e0007580. doi: 10.1371/journal.pntd.0007580
5. World Health Organization. Working to overcome the global impact of neglected tropical diseases: First WHO report on neglected tropical diseases. W.



2010. Available from: <https://www.who.int/publications/i/item/9789241564090>

6. Roepstorff A, Mejer H, Nejsum P, and Thamsborg SM. Helminth parasites in pigs: new challenges in pig production and current research highlights. *Vet Parasitol.* 2011; 180(1–2):72–81. doi: 10.1016/j.vetpar.2011.05.029

7. Nissen S, Poulsen IH, Nejsum P, Olsen A, Roepstorff A, Rubaire-Akiiki C, et al. Prevalence of gastrointestinal nematodes in growing pigs in Kabale District in Uganda. *Trop Anim Health Prod.* 2011; 43(3):567–72. doi: 10.1007/s11250-010-9732-x

8. Thamsborg SM, Nejsum P, Mejer H. Impact of *Ascaris suum* in livestock. In Holland C, editor, *Ascaris: The Neglected Parasite*. Elsevier. 2013. p. 363–381 <https://doi.org/10.1016/B978-0-12-396978-1.00014-8>

9. Katakam KK, Thamsborg SM, Dalsgaard A, Kyvsgaard NC, and Mejer H. Environmental contamination and transmission of *Ascaris suum* in Danish organic pig farms. *Parasit Vectors.* 2016; 9:80. doi: 10.1186/s13071-016-1349-0

10. Ansel M and Thibaut M. Value of the specific distinction between *Ascaris lumbricoides* Linnè 1758 and *Ascaris suum* Goeze 1782. *Int J Parasitol.* 1973; 3(3):317–9. doi: 10.1016/0020-7519(73)90109-4

11. Leles D, Gardner SL, Reinhard K, Iñiguez A, and Araujo A. Are *Ascaris lumbricoides* and *Ascaris suum* a single species? *Parasit Vectors.* 2012; 5:42.

doi: 10.1186/1756-3305-5-42

12. Barbosa FS. Potencial zoonótico da ascaridiose humana e suína: aspectos moleculares, morfológicos e filogenéticos das espécies *Ascaris lumbricoides* e *Ascaris suum*. M.Sc. Thesis, Federal University of Minas Gerais. 2015. Available from: <http://hdl.handle.net/1843/BUBD-AC7HTR>

13. Zhu X., Chilton NB, Jacobs DE, Boes J, and Gasser RB. Characterisation of *Ascaris* from human and pig hosts by nuclear ribosomal DNA sequences. *Int J Parasitol.* 1999; 29(3):469–78. doi: 10.1016/s0020-7519(98)00226-4

14. Sadaow L, Sanpool O, Phosuk I, Rodpai R, Thanchomnang T, Wijit A, et al. Molecular identification of *Ascaris lumbricoides* and *Ascaris suum* recovered from humans and pigs in Thailand, Lao PDR, and Myanmar. *Parasitol Res.* 2018; 117(8):2427–36. doi: 10.1007/s00436-018-5931-6

15. Palma A, Ortiz B, Mendoza L, Matamoros G, Gabrie JA, Sánchez AL, et al. Molecular analysis of human- and pig-derived *Ascaris* in Honduras. *J Helminthol.* 2019; 93(2):154–58. doi: 10.1017/S0022149X18000160

16. IBGE. Brazilian Institute of Geography and Statistics. *Indigenous youth.* 2022. Available from: <https://educa.ibge.gov.br/jovens/conheca-o-brasil/populacao/20506-indigenas.html>

17. Faustino RC, Chaves M, Toledo MJO, Mota LT, Angelis-Neto G, and Nanni

MR. Pedagogical interventions in health education carried out with the Kaingang indigenous groups of Ivai and Faxinal in Paraná. *Science Care Health*. 2008; 7; 6 Suppl 2:433–41.

18. Brazil. Ministry of Health. Department of Health Surveillance. Department of Communicable Disease Surveillance. Practical Guide for the Control of Geohelminthiases [electronic resource] / Ministry of Health, Health Surveillance Secretariat, Department of Communicable Diseases Surveillance. – Brasília: Ministry of Health, 2018. Available from: <https://www.gov.br/saude/pt-br/assuntos/saude-de-aaz/g/geo-helmintose>

19. Köster PC, Malheiros AF, Shaw JJ, Balasegaram S, Prendergast A, Lucaccioni H, et al. Multilocus genotyping of *Giardia duodenalis* in mostly asymptomatic indigenous people from the Tapirapé tribe, Brazil Amazon. *Pathogens*. 2021; 10(2):206. doi: 10.3390/pathogens10020206

20. Leboef A. Making Sense of One Health; Cooperating at the Human–Animal–Ecosystem Health Interface *Health and Environment Reports*. 2011; 7, April.

21. Mackenzie JS and Jeggo M. The One Health Approach—Why is it so important? *Trop Med Infect Dis*. 2019; 4(2):88. doi: 10.3390/tropicalmed4020088

22. Department of Education. Government of the State of Paraná. 2022.

23. Maldaner MP. Guarani indigenous education and culture: educational

practices at the Teko Nẽmoingo indigenous state college, Tekoha Ocoy. Master's Dissertation. Federal University of Latin American Integration - Contemporary Postgraduate Program in Latin America. 2017. Available from: <http://dspace.unila.edu.br/123456789/691>

24. Toledo MJO, Paludetto AW, Moura FT, Nascimento ES, Chaves M, Araújo SM, et al. Evaluation of enteroparasite control activities in a Kaingáng community of Southern Brazil. *Rev Saude Publica*. 2009; 43(6):981–90. doi: 10.1590/s0034-89102009005000083

25. Brant de Carvalho ML. Anthropological report: Ava Guarani (Nhandéva) indigenous population. Oco'y indigenous land. Municipality of São Miguel do Iguaçu. Paraná. Brazil. Anthropological report requested by the Federal Public Ministry and Federal Court of Foz do Iguaçu. FUNAI. 2004.

26. Brazil. Ministry of Health. Protocols for investigating *Toxoplasma gondii* in environmental and food samples [electronic resource] / Ministry of Health, State University of Londrina. – Brasília: Ministry of Health, 2020.

27. Lutz A. *Schistosomum mansoni* and schistosomiasis according to observations made in Brazil. *Mem Inst Oswaldo Cruz*. 1919; 11(1):121-55.

28. Ritchie LS. An ether sedimentation technique for routine stool examination. *Bull U S Army Med Dep*. 1948; 8(4):326.

29. Bezagio RC, Colli CM, Romera LIL, de Almeida CR, Ferreira ÉC, and Gomes ML. Comparative analysis of routine parasitological methods for recovery of cysts, molecular detection, and genotyping of *Giardia duodenalis*. *Eur J Clin Microbiol Infect Dis*. 2021; 40(12):2633–38. doi: 10.1007/s10096-021-04280-9
30. Ishiwata K, Shinohara A, Yagi K, Horii Y, Tsuchiya K, and Nawa Y. Identification of tissue-embedded ascarid larvae by ribosomal DNA sequencing. *Parasitol Res*. 2004; 92(1):50–2. doi: 10.1007/s00436-003-1010-7
31. Santos TR. Standardization and application of a species-specific polymerase chain reaction for differentiation between the species *Ascaris lumbricoides* and *Ascaris suum*. Dissertation (Master's degree) – Federal University of Minas Gerais, Institute of Biological Sciences. Postgraduate Program in Parasitology. 2021. Available from: <https://repositorio.ufmg.br/handle/1843/37736>
32. Anuar TS, Salleh FM, and Moktar N. Soil-transmitted helminth infections and associated risk factors in three Orang Asli tribes in Peninsular Malaysia. *Sci Rep*. 2014; 4:4101. doi: 10.1038/srep04101
33. Benavides-Jimenez HA, Velandia Sua EA, Vargas Gil OA, Rodríguez LJV, Carvajal BFV, Carrero SHS, et al. Prevalence of intestinal parasitism in children of the U'wa indigenous community in Boyacá, Colombia. *Rev Med Risaralda, Pereira*, v. 28, no. 1, p. 12-22, June 2022. Epub July 05, 2022. doi: 10.22517/25395203.24925.

34. Carneiro FF, Cifuentes E, Tellez-Rojo MM, and Romieu I. The risk of *Ascaris lumbricoidis* infection in children as an environmental health indicator to guide preventive activities in Caparaó and Alto Caparaó, Brazil. Bull World Health Organ. 2002; 80(1):40–6.
35. Holanda TB and Vasconcellos MC. Geo-helminths: analysis and its relationship with sanitation: an integrative review. Hygeia, v.11, n.20, p.1-11, Jun. 2015. doi: 10.14393/Hygeia1123469
36. Arizono N, Yoshimura Y, Tohzaka N, Yamada M, Tegoshi T, Onishi K, et al. Ascariasis in Japan: is pig-derived *Ascaris* infecting humans? Jpn J Infect Dis. 2010; 63(6):447–8. PMID: 21099099.
37. Avery RH, Wall LA, Verhoeve VI, Gipson KS, and Malone JB. Molecular confirmation of *Ascaris suum*: further investigation into the zoonotic origin of infection in an 8-year-old boy with Loeffler syndrome. Vector Borne Zoonotic Dis. 2018; 18(11):638–40. doi: 10.1089/vbz.2018.2306
38. Miller LA, Colby K, Manning SE, Hoenig D, McEvoy E, Montgomery S, et al. Ascariasis in humans and pigs on small-scale farms, Maine, USA, 2010–2013. Emerg Infect Dis. 2015; 21(2):332–4. doi: 10.3201/eid2102.140048
39. Anderson TJ. *Ascaris* infections in humans from North America: molecular evidence for cross-infection. Parasitology. 1995; 110(Pt 2):215–19. doi: 10.1017/s0031182000063988

40. Nejsum P, Roepstorff A, Jorgensen CB, Fredholm M, Göring HHH, Anderson TJC, et al. High heritability for *Ascaris* and *Trichuris* infection levels in pigs. *Heredity (Edinb)*. 2009; 102(4):357–64. doi: 10.1038/hdy.2008.131
41. Betson M, Nejsum P, Bendall RP, Deb RM, and Stothard JR. Molecular epidemiology of ascariasis: a global perspective on the transmission dynamics of *Ascaris* in people and pigs. *J Infect Dis*. 2014; 210(6):932–41. doi: 10.1093/infdis/jiu193
42. Taus K, Schmoll F, El-Khatib Z, Auer H, Holzmann H, Aberle S, et al. Occupational swine exposure and Hepatitis E virus, *Leptospira*, *Ascaris suum* seropositivity and MRSA colonization in Austrian veterinarians, 2017–2018-A cross-sectional study. *Zoonoses Public Health*. 2019; 66(7):842–51. doi: 10.1111/zph.12633
43. da Silva TE, Barbosa FS, Magalhães LMD, Gazzinelli-Guimarães PH, Dos Santos AC, Nogueira DS, et al. Unraveling *Ascaris suum* experimental infection in humans. *Microbes Infect*. 2021; 23(8):104836. doi: 10.1016/j.micinf.2021.104836
44. Chaves LA, Gonçalves ALR, Paula FM, Silva NM, Silva CV, Costa-Cruz JM, et al. Comparison of parasitological, immunological and molecular methods for evaluation of fecal samples of immunosuppressed rats experimentally infected with *Strongyloides venezuelensis*. *Parasitology*. 2015; 142(14):1715–21. doi:

10.1017/S0031182015001298

45. Korzeniewski K. Prevalence of intestinal parasitic infections in the population of Central Asia on the example of inhabitants of Eastern Afghanistan. *Przegl Epidemiol.* 2016 ;70(4):563–73.

46. Inocencio da Luz R, Linsuke S, Lutumba P, Hasker E, and Boelaert M. Assessment of schistosomiasis and soil-transmitted helminths prevalence in school-aged children and opportunities for integration of control in local health services in Kwilu Province, the Democratic Republic of the Congo. *Trop Med Int Health.* 2017; 22(11):1442–50. doi: 10.1111/tmi.12965

47. Avanus K and Altinel A. Comparison of allele-specific PCR, created restriction-site PCR, and PCR with primer-introduced restriction analysis methods used for screening complex vertebral malformation carriers in Holstein cattle. *J Vet Sci.* 2017; 18(4):465–70. doi: 10.4142/jvs.2017.18.4.465

48. Lefever S, Rihani A, Van der Meulen J, Pattyn F, Van Maerken T, Van Dorpe J, et al. Cost-effective and robust genotyping using double-mismatch allele-specific quantitative PCR. *Sci Rep.* 2019; 9(1):2150. doi: 10.1038/s41598-019-38581-z

49. Neves DP. *Human Parasitology.* 14th ed. São Paulo: Editora Atheneu, 2022.

50. Amoah ID, Singh G, Troell K, Reddy P, Stenström TA, and Bux F.



Comparative assessment of DNA extraction procedures for *Ascaris* spp. eggs. J Helminthol. 2019; 94, e78. doi: 10.1017/S0022149X19000683

51. Peng W, Yuan K, Zhou X, Hu M, EL-Osta YGA, and Gasser RB. Molecular epidemiological investigation of *Ascaris* genotypes in China based on single-strand conformation polymorphism analysis of ribosomal DNA. Electrophoresis. 2003; 24(14): 2308–15. doi: 10.1002/elps.200305455

52. Peng W, Yuan K, Hu M, Zhou X, and Gasser RB. Mutation scanning-coupled analysis of haplotypic variability in mitochondrial DNA regions reveals low gene flow between human and porcine *Ascaris* in endemic regions of China. Electrophoresis. 2005; 26(22):4317–26. doi: 10.1002/elps.200500276

53. Monteiro KJL, Calegar DA, Santos JP, Bacelar PAA, Coronato-Nunes B, Reis ERC, et al. Genetic diversity of *Ascaris* spp. infecting humans and pigs in distinct Brazilian regions, as revealed by mitochondrial DNA. PLoS One. 2019; 14(6):e0218867. doi: 10.1371/journal.pone.0218867

54. Criscione CD, Anderson JD, Sudimack D, Peng W, Jha B, Williams-Blangero S, et al. Disentangling hybridization and host colonization in parasitic roundworms of humans and pigs. Proc Biol Sci. 2007; 274(1626):2669–77. doi: 10.1098/rspb.2007.0877

55. Zhu X, Gasser RB, Jacobs DE, Hung GC, and Chilton NB. Relationships among some ascaridoid nematodes based on ribosomal DNA sequence data.

Parasitol Res. 2000; 86(9):738–44. doi: 10.1007/pl00008561

56. Leles D, Araújo A, Vicente ACP, and Iñiguez AM. Molecular diagnosis of ascariasis from human feces and description of a new *Ascaris* sp. Genotype in Brazil. Vet Parasitol. 2009; 163(1–2):167–70. doi: 10.1016/j.vetpar.2009.03.050

57. Blouin MS. Molecular prospecting for cryptic species of nematodes: mitochondrial DNA versus internal transcribed spacer. Int J Parasitol. 2002; 32(5):527–31. doi: 10.1016/s0020-7519(01)00357-5

58. Moura FT, Falavigna DLM, Mota LT, and Toledo MJO. Enteroparasite contamination in peridomiciliar soils of two indigenous territories, State of Paraná, southern Brazil. Rev Panam Salud Publica. 2010; 27(6):414–22. doi: 10.1590/s1020-49892010000600002

59. Bracho Mora AM, Rivero de Rodríguez Z, Fuentes MJ, Vera Montilla F, Aguirre Colina M, Bertel LM, et al. Geohelminthiasis in native communities from Zulia State, Venezuela. Rev Cuba Med Trop. 2021; 73(2):e612.

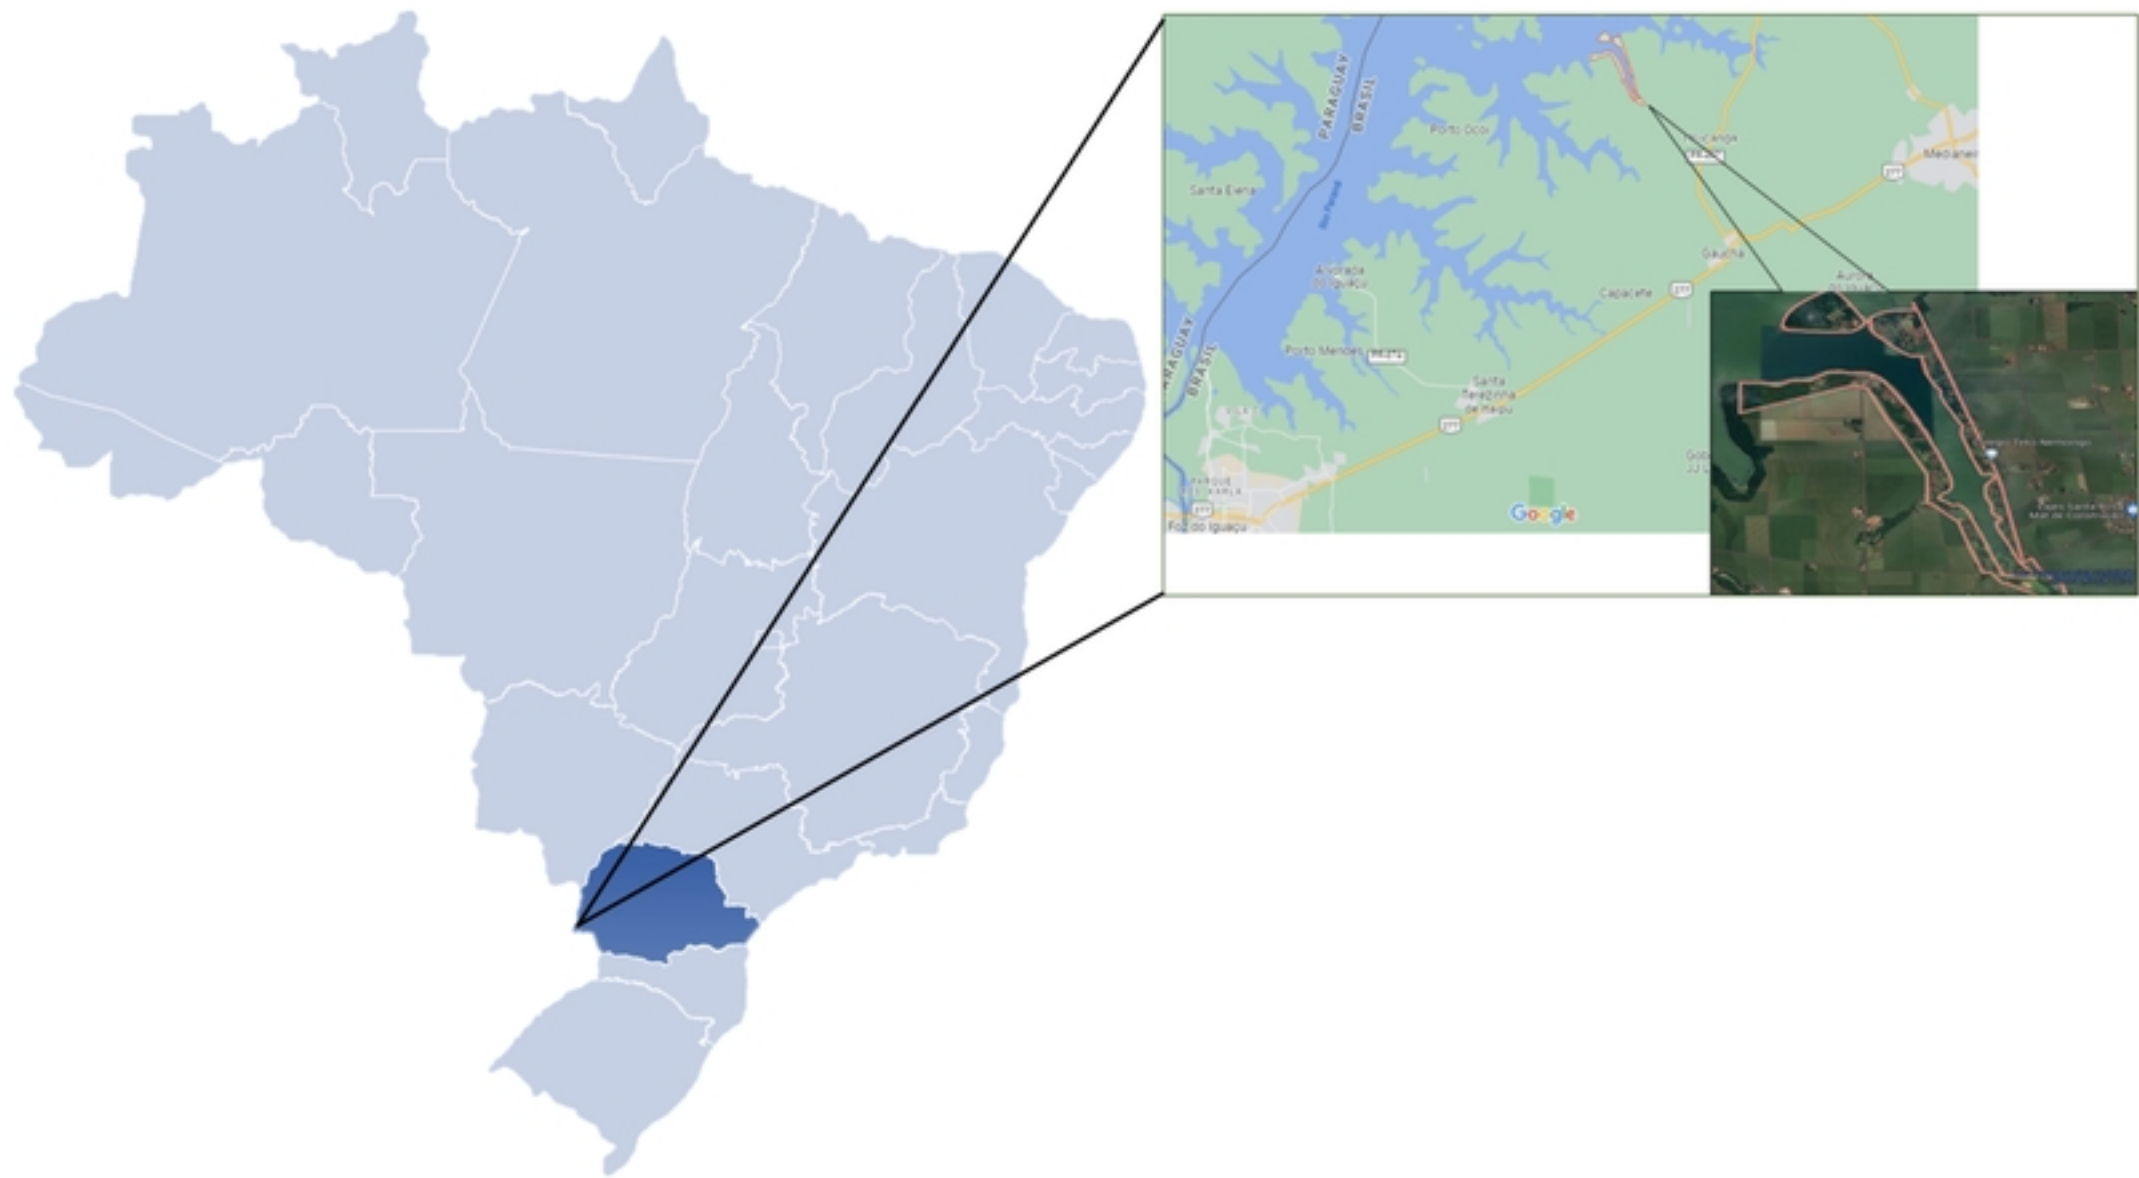

Figure 1

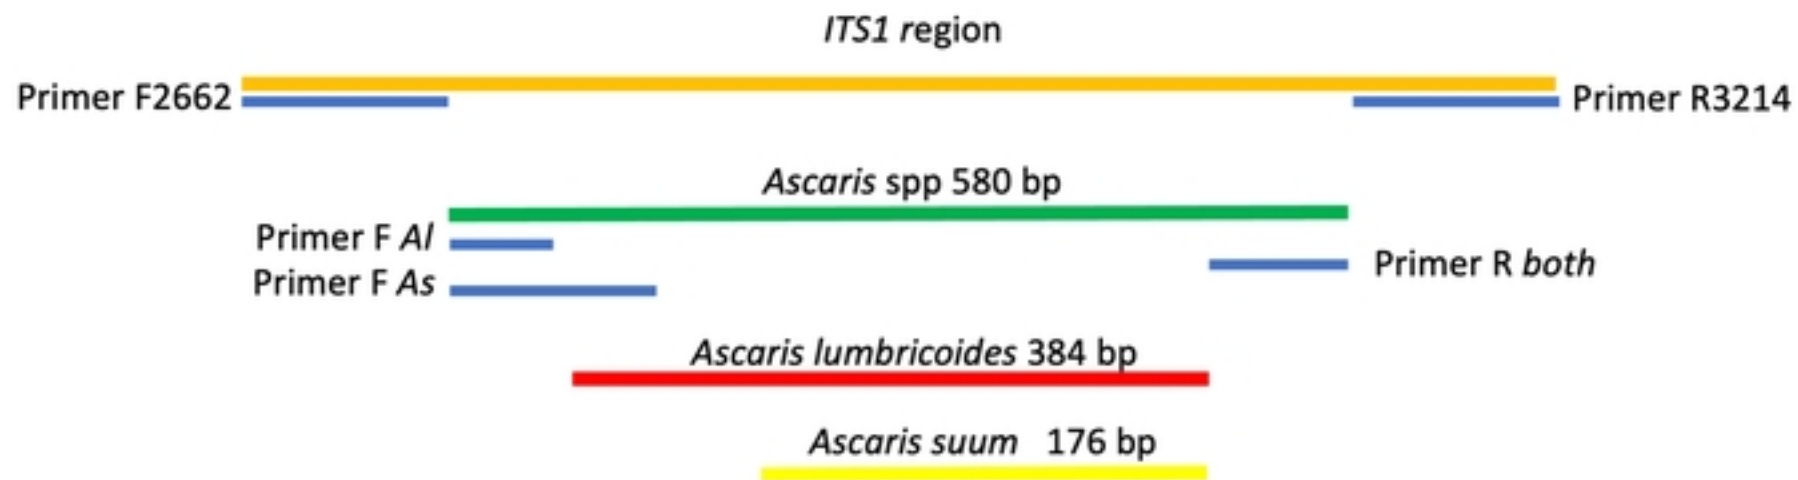

Figure 2

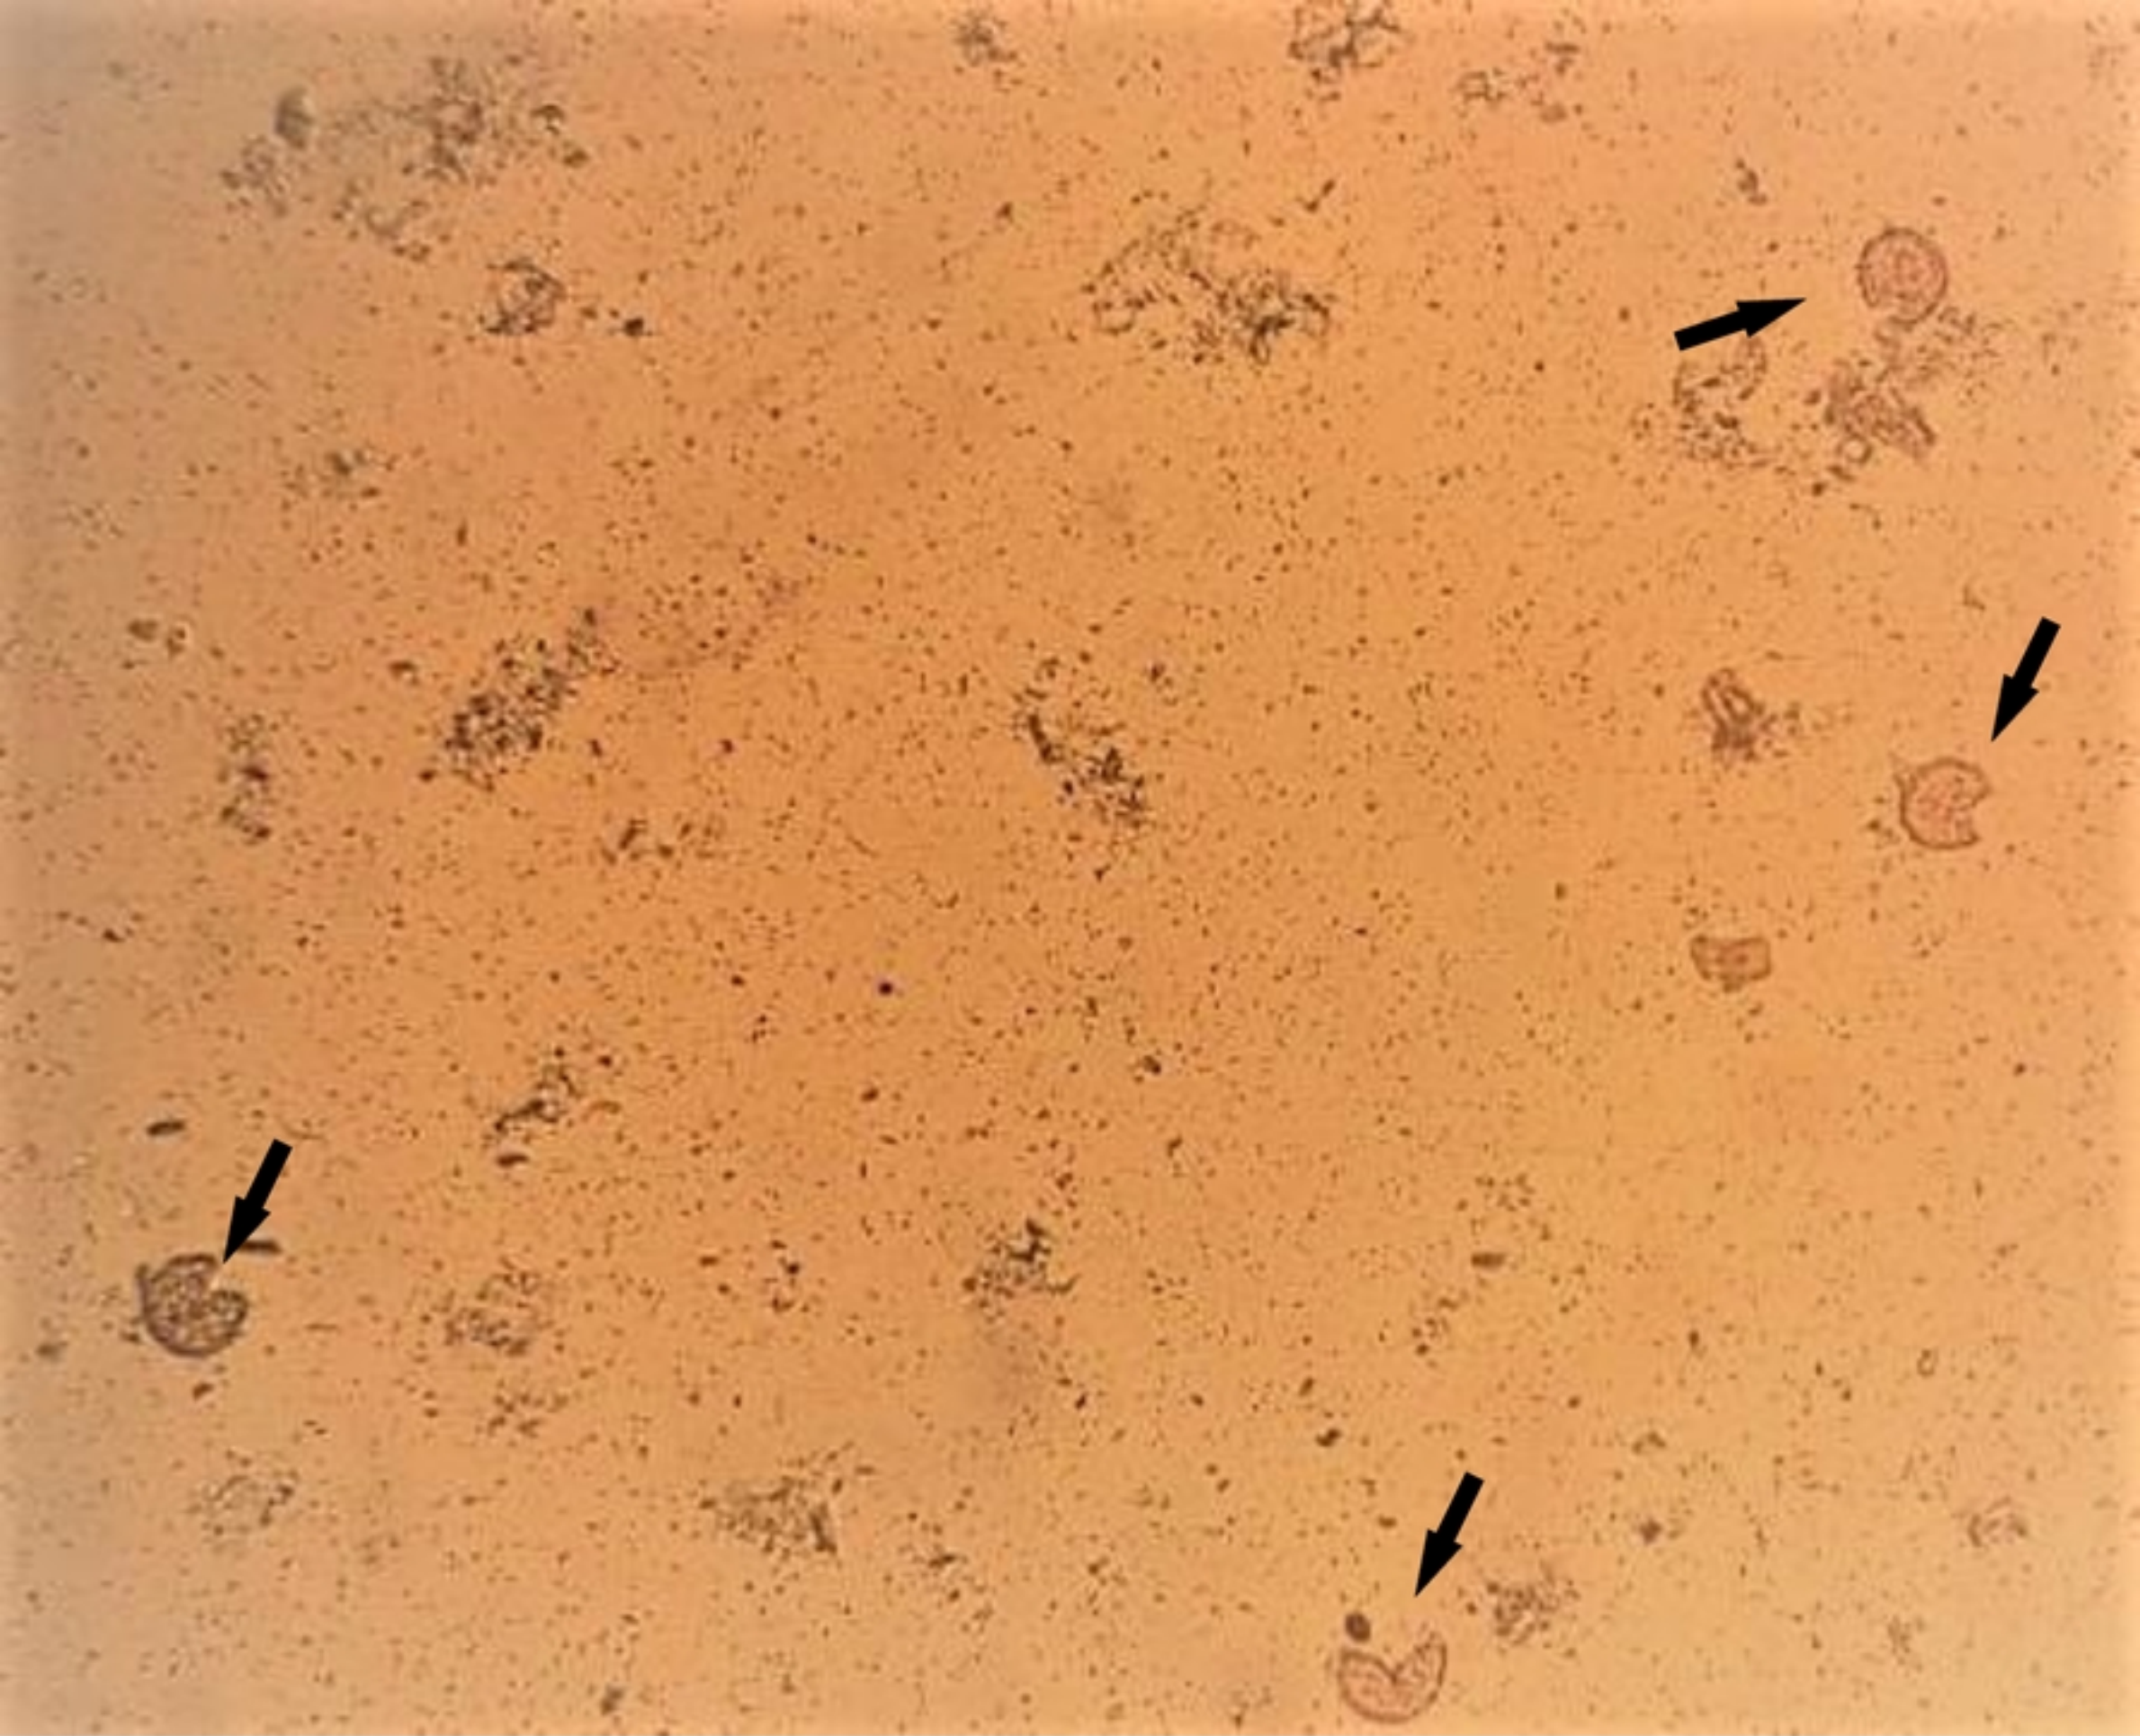

Figure 3

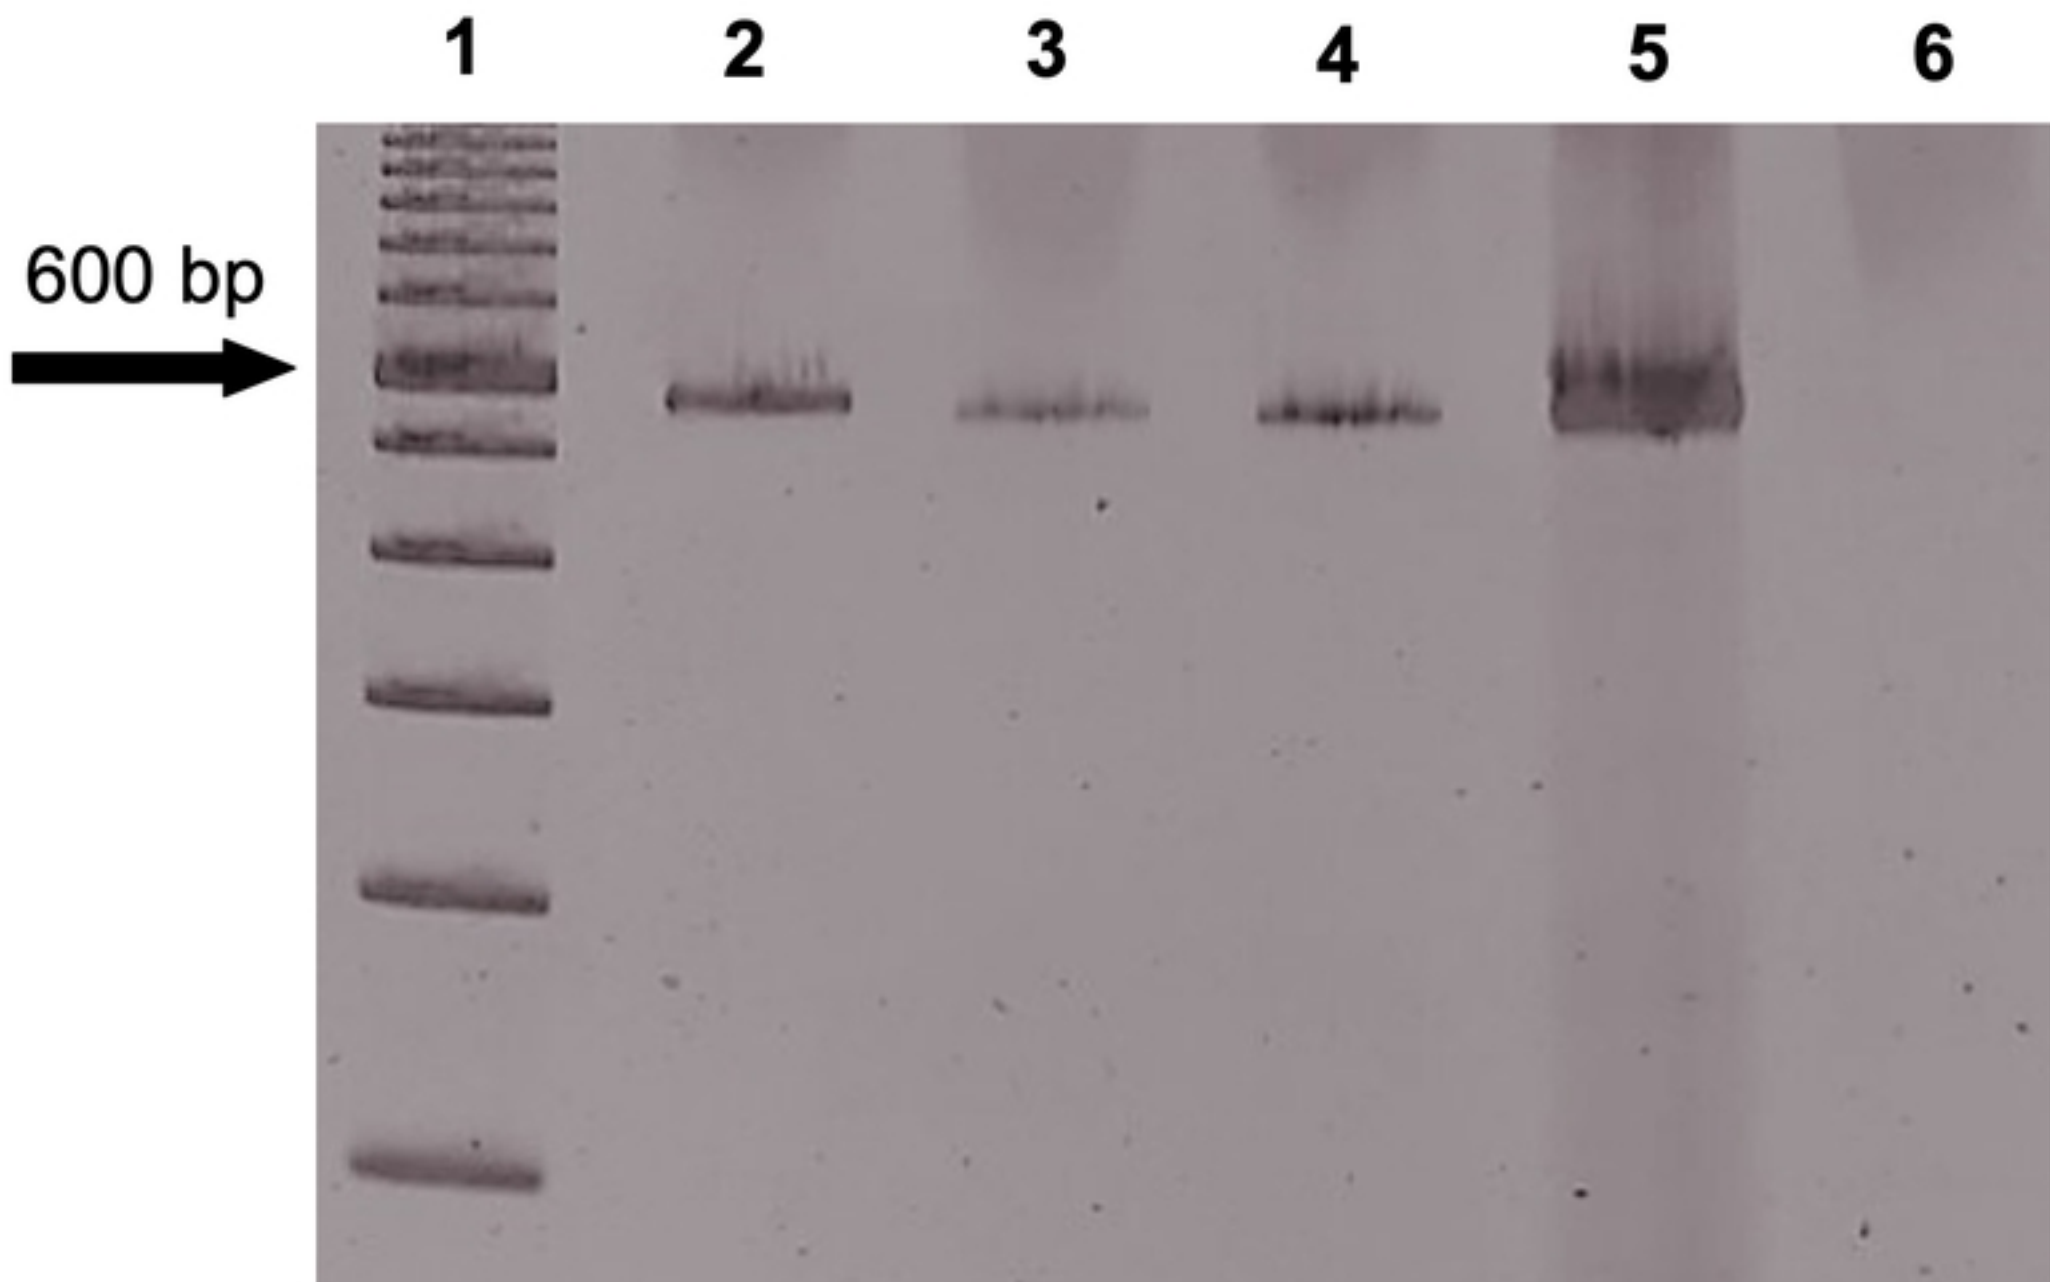

Figure 4

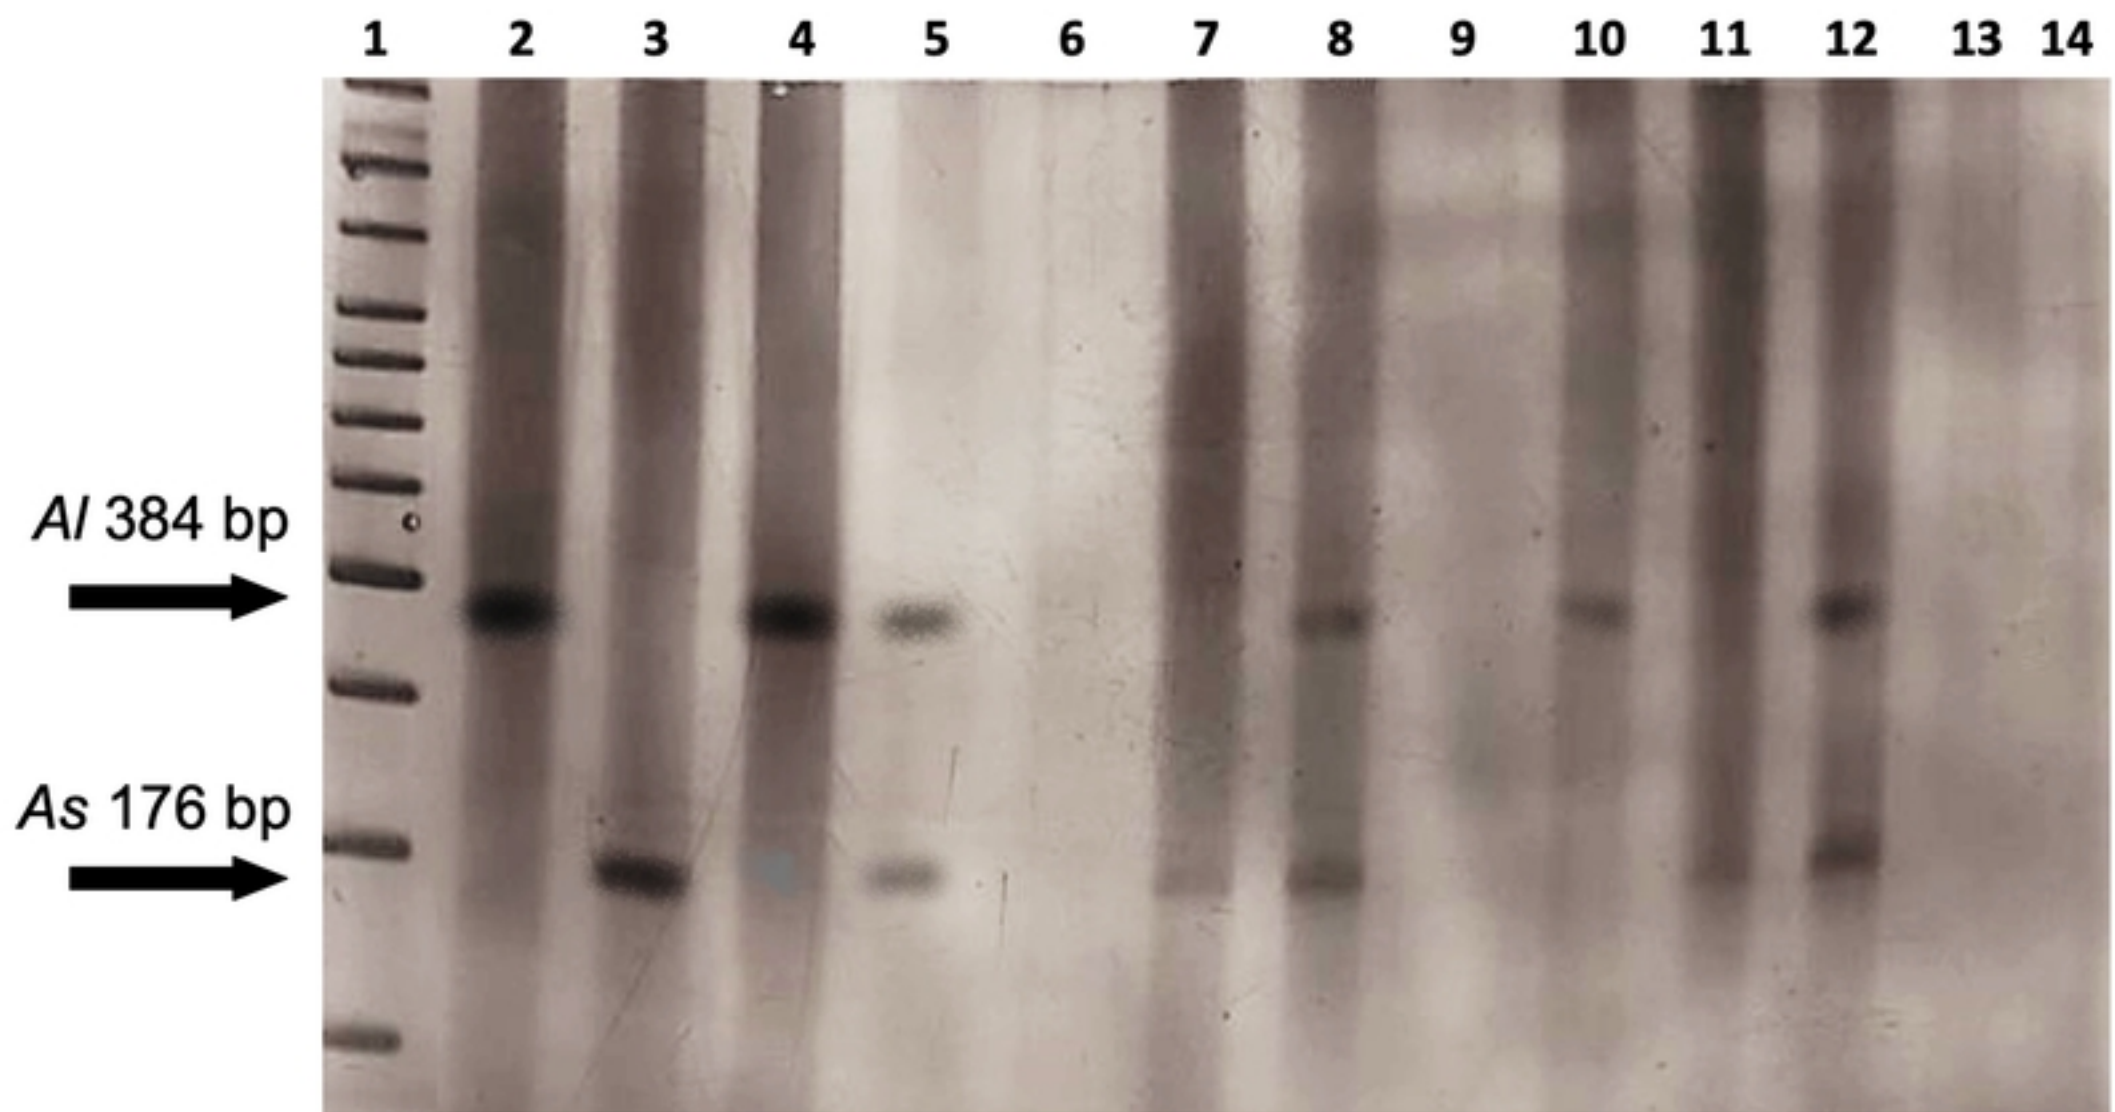

Figure 5
